# Supplementary material for: Spatio-temporal variation of ecosystem services value in the Northern Tianshan Mountain Economic zone from 1980 to 2030
Source: PeerJ. 2020 Aug 5;8:e9582. doi: 10.7717/peerj.9582 (PMC7414770; doi:10.7717/peerj.9582)
Supplement: Supplemental Information 5 [file peerj-08-9582-s005.xlsx]

## Sheet: LUCC Data
Land use/cover component in the NTMEZ during 1980-2030
LULC		Forestland	Grassland	Cropland	Waterbody	Buildland	Unutilized land
Area (km2)	1980	3722.82	40939	10205	3093.59	643.15	37206
	1990	3977.29	40888.3	9847.97	2956.23	812.8	36917.4
	2000	4012.11	40428.8	10412	3272.74	994.48	36279.9
	2010	3970.33	39461.5	11767.3	3392.38	1095.13	35713.4
	2020	3851.32	38142.3	13732.8	3368.96	1540.78	34763.8
	2030	3846.26	36252	13713.2	3357.56	1908	33390
Land-use dynamic in the study area during 1980-2030
LULC		Forestland	Grassland	Cropland	Waterbody	Buildland	Unutilized land
Change (%)	1980-2010	0.0665	-0.0361	0.1531	0.0966	0.7028	-0.0401
	2010-2030	-0.0312	-0.0813	0.1654	-0.0103	0.7423	-0.0651
	1980-2030	0.0332	-0.1145	0.3438	0.0853	1.9666	-0.1026
The proportion of LUCC and ESV
LUCC	Forestland	Grassland	Cropland	Waterbody	Building land	Unutilized land
1980	0.0388565	0.427295	0.106513	0.032289	0.0067128	0.388333
1990	0.0416907	0.428599	0.103228	0.0309877	0.00851992	0.386975
2000	0.0420557	0.423782	0.10914	0.0343055	0.0104243	0.380293
2010	0.0416177	0.413643	0.123347	0.0355595	0.0114794	0.374354
2020	0.0403702	0.399814	0.14395	0.035314	0.0161507	0.364401
2030	0.0402889	0.379733	0.175068	0.0351698	0.019986	0.349754
ESV	Forestland	Grassland	Cropland	Water body	Building land	Unused land
1980	0.135377	0.494253	0.117497	0.237548	-0.0102171	0.0255428
1990	0.145995	0.498708	0.114987	0.228682	-0.0142119	0.0258398
2000	0.143758	0.481715	0.118537	0.247163	-0.0163934	0.0252207
2010	0.141074	0.465668	0.132335	0.253433	-0.0174782	0.0249688
2020	0.138365	0.45283	0.155975	0.254088	-0.0251572	0.0238994
2030	0.142857	0.444156	0.161039	0.261039	-0.0324675	0.0233766

## Sheet: Climate and Social Data
Changes in human activities in the study area
Year	Population/10^4people	Urban population/10^4people	GDP/10^8Yuan	Primary industry/10^8Yuan	Secondary industry/10^8Yuan	Tertiary industry/10^8Yuan	Per capita GDP/10^8Yuan	Grain output/10^4t
1980	346.475	259.856	21.044	7.78628	6.94452	6.3132	0.0607375	34.7517
1985	367.508	275.631	44.264	16.9974	15.8022	11.4201	0.120444	44.6985
1986	373.583	280.187	49.696	18.3875	16.3997	14.9088	0.133025	49.0239
1987	379.709	284.782	58.704	21.7205	19.3723	17.6112	0.154603	52.5879
1988	385.133	288.846	75.548	27.9528	24.9308	22.6644	0.196161	54.5571
1989	391.5	297.54	86.8	31.1612	29.5988	26.04	0.221711	55.8
1990	404.654	307.537	100.4	37.7504	33.3328	29.3168	0.248113	57.6
1991	419.707	318.977	124.688	46.1346	41.147	37.4064	0.297084	60.5268
1992	426.77	332.881	152.904	56.5745	50.4583	45.8712	0.358282	63.5643
1993	433.35	338.013	200	74	66	60	0.461521	61.2
1994	440.829	343.847	269.472	99.7046	88.9258	80.8416	0.611285	59.9553
1995	448.565	349.88	333.828	123.516	110.163	100.148	0.744214	65.7
1996	461.11	362.29	398.709	128.165	111.707	158.837	0.864672	74.65
1997	474	393.96	427.868	94.3	156.784	176.784	0.902684	75.41
1998	481.29	402.96	479.622	70.869	198.765	209.988	0.996536	78.54
1999	490.24	410.2	526.381	81.0177	225.029	220.335	1.07373	76.66
2000	499.38	418.91	587.365	80.6466	257.731	248.988	1.17619	86.43
2001	553.33	424.21	657.867	80.1638	298.766	278.938	1.18892	90.14
2002	506.51	456.89	692.928	62.0264	339.54	291.361	1.36804	93.15
2003	530.26	472.01	759.954	71.0091	355.636	333.309	1.43318	118.89
2004	538.61	481.55	901.001	86.3468	436.373	378.281	1.67283	97.04
2005	548.52	495.67	1172.69	126.22	590.98	455.488	2.13791	57.84
2006	558.76	505.24	1426.71	164.066	699.995	562.65	2.55335	119.15
2007	570.85	529.73	1689.28	171.409	869.779	648.093	2.95924	125.3
2008	584.57	542.36	1965.97	198.706	1004.34	762.924	3.3631	105.41
2009	594.64	551.24	2461.53	232.775	1326.89	901.869	4.13953	124.82
2010	604.21	558.47	2445.42	261.304	1223.32	960.799	4.0473	229.15
2011	609.34	564.89	3136.4	342.794	1664.04	1129.56	5.1472	271.9
2012	612.44	570.34	3821.83	387.356	2036.86	1397.62	6.24034	505.25
2013	621.08	580.8	4379.29	437.329	2216.23	1725.73	7.05109	519.12
2014	628.02	589.7	4865.04	454.089	2396.03	2014.93	7.74664	609.86
2015	635.07	594.19	5342.18	491.195	2465.21	2385.78	8.41196	596.65
Changes in the climatic factors in the study area
Year	Average annual precipitation/mm	Average annual temperature/℃	Potential evaporation/mm			Year	Runoff/10^8 m^3
1980	196.774	6.8002	1037.4				Manas River	Hutubi River	Urumqi River	Toutun River	Total
1981	209.677	6.5206	1062.83			1980	11.7314	4.401	2.1291	2.23127	20.4928
1982	166.667	7.4079	1104.84			1981	12.6715	4.9627	2.7205	2.25907	22.6138
1983	185.484	7.7817	1084.43			1982	10.4957	4.4008	2.3177	2.06757	19.2817
1984	198.925	5.1915	1021.36			1983	9.8993	3.7984	2.4215	2.10772	18.2269
1985	172.581	6.0555	1037.87			1984	10.3698	4.1283	2.0876	1.86062	18.4463
1986	181.72	6.3359	1053.79			1985	11.1815	3.6706	1.8997	1.79266	18.5445
1987	290.86	6.5932	1030.84			1986	12.4201	5.101	2.4757	2.4166	22.4134
1988	255.914	6.4535	1039.07			1987	13.36	4.8113	2.4	2.15097	22.7223
1989	182.258	7.1074	1065.16			1988	12.0163	5.1413	2.4221	2.01197	21.5917
1990	219.892	7.5046	1086.8			1989	11.5692	4.7416	2.7679	1.88842	20.9671
1991	167.742	7.4583	1088.7			1990	12.5091	4.7704	2.5	1.80811	21.5876
1992	238.172	6.6185	1028.8			1991	10.2902	4.7587	2.2846	2.17259	19.506
1993	264.516	5.9888	1001.37			1992	11.2302	4.7354	2.6648	2.40116	21.0316
1994	233.333	6.7362	1046.57			1993	12.2554	5.0539	3.2023	2.40425	22.9159
1995	170.43	7.2968	1063.75			1994	11.9575	4.5846	2.7648	2.20965	21.5165
1996	226.882	6.3635	1100.65			1995	14.9891	6.0382	3.0567	3.08996	27.174
1997	140.323	8.0678	1123.56			1996	14.7765	5.3084	2.5	2.42896	25.0139
1998	287.634	7.4381	1084.06			1997	14.7765	6.1528	3.0379	2.79653	26.7637
1999	266.129	7.6018	1074.48			1998	20.2843	6.3274	2.7271	2.26525	31.6041
2000	227.419	7.2989	1098.02			1999	16.4008	5.8119	2.781	2.82124	27.8149
2001	222.581	7.6727	1103.09			2000	14.78	4.9951	1.7639	2.09846	23.6375
2002	277.419	7.8131	1057.82			2001	14.6958	5.9402	2.6163	2.65135	25.9036
2003	247.849	6.7166	1037.44			2002	11.239	4.6068	2.3822	2.80888	21.0369
2004	256.452	7.6973	1075.62			2003	12.3925	4.1782	2.2595	2.38571	21.2159
2005	213.978	7.2777	1113.16			2004	13.4175	4.9078	2.3749	2.54942	23.2496
2006	200	8.2116	1109.95			2005	13.2903	4.1084	1.9375	2.20965	21.5458
2007	260.753	8.0953	1123.31			2006	15.5106	6.199	3.0278	2.66371	27.4011
2008	165.054	8.1891	1123.92			2007	13.9322	4.5136	2.1066	1.93784	22.4902
2009	231.183	7.6295	1067.22			2008	11.6729	6.2	2.7	1.8	22.3729
2010	271.505	7.1864	1055.73			2009	13.3434	4.6	2.3	2	22.2434
2011	245.161	7.0935	1123.8			2010	12.3459	5	2.2	2.2	21.4
2012	195.161	6.7904	1143.04			2011	11	5.1	2.1	1.9	20.1
2013	241.935	7.9812	1198			2012	10.6427	5	No Data	No Data	No Data
						2013	14.123	No Data	No Data	No Data	No Data

## Sheet: Landsat Data
Data	Link
Landsat TM/ETM remote sensing image data	http://www.usge.gov
DEM	http://www.gscloud.cn
Meteorological data	http://cdc.cma.gov.cn
Population and GDP	http://www.resdc.cn
Others	http://ngcc.sbsm.gov.cn/
